# Supplementary material for: Non-Pleiotropic Coupling of Daily and Seasonal Temporal Isolation in the European Corn Borer
Source: PubMed Central journal article supplement (PMC5924522; doi:10.3390/genes9040180), 2018-03-26
Supplement: genes-09-00180-s001.pdf [file genes-09-00180-s001.pdf]

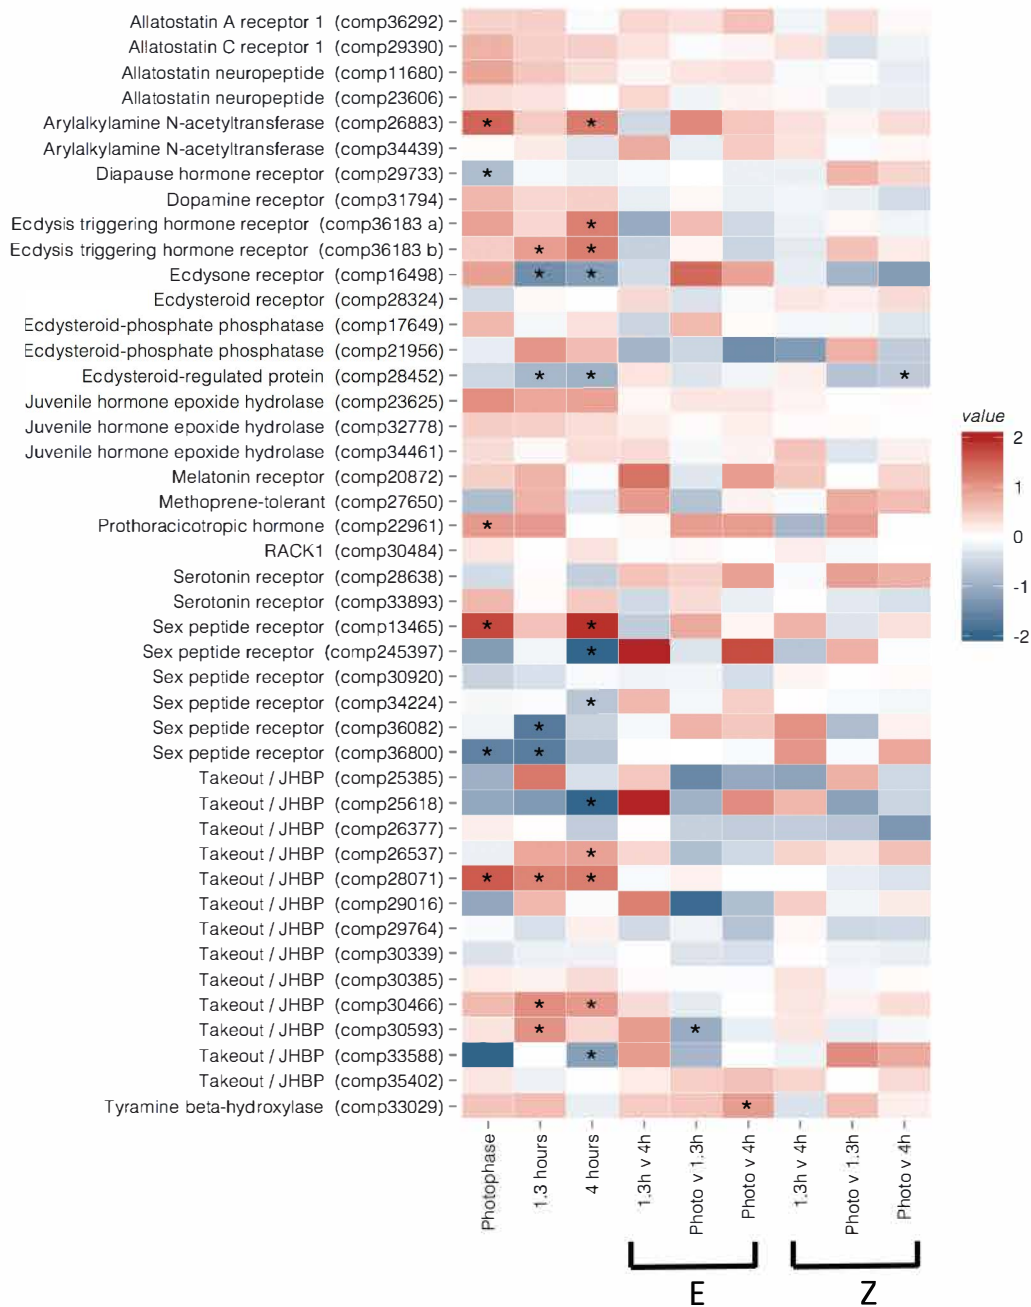

**Figure S1.**

Heatmap of relative expression of downstream candidate transcripts in each contrast. Photophase, 1.3 hour, and 4 hour contrasts are E vs. Z. Values are z-scored logFC, with red color indicating upregulation in the first term of each contrast, and blue color indicating upregulation in the second term of each contrast. Z-scores were capped to a minimum of -2 and a maximum of 2 for visualization. Asterisks indicate genes that are significantly differentially expressed (FDR-corrected p-value < 0.05) for a given contrast.

**Table S1.** Summary statistics of transcriptome assembly in Trinity.

| <b>Summary Statistics</b> |        |
|---------------------------|--------|
| Unique Reads              | 61.5 M |
| Transcripts               | 78,236 |
| Components                | 40,811 |
| Minimum Read Length       | 201    |
| Maximum Read Length       | 17,430 |
| Mean Read Length          | 1,136  |
| Median Read Length        | 691    |
| N50                       | 1,918  |

**Supplemental Table 2.** Overlapping differentially expressed genes between daily and seasonal time courses.

| Candidate    | Levy Comp          | Wadsworth Comp     | Gene Symbol    | DE Diapause | DE Daily    | Gene Name                                       | Function                                               |
|--------------|--------------------|--------------------|----------------|-------------|-------------|-------------------------------------------------|--------------------------------------------------------|
| PDD Interval | comp9904_c0_seq1   | comp34828_c0_seq1  | CG30427        | D1          | Hr4         | Fatty acyl-CoA reductase                        | Determination of lifespan                              |
| PDD Interval | comp48611_c0_seq1  | comp19186_c0_seq1  | CBG16133       | D1          | P,Hr1.3,Hr4 | NA                                              | NA                                                     |
| PDD Interval | comp36669_c0_seq10 | comp25161_c0_seq1  | <i>Magu</i>    | D1          | Hr4         | NA                                              | Regulation of life span, BMP signalling                |
| PDD Interval | comp35947_c0_seq1  | comp9449_c0_seq1   | <i>GAPsec</i>  | D1          | P,Hr1.3,Hr4 | GTPase-activating, SECIS-dependent read-through | Translation                                            |
| PDD Interval | comp27771_c0_seq2  | comp19707_c0_seq1  | <i>CG10338</i> | D7          | Hr1.3,Hr4   | NA                                              | NA                                                     |
| PDD Interval | comp26528_c0_seq1  | comp18687_c0_seq1  | <i>Plod</i>    | D7          | P,Hr1.3,Hr4 | Procollagen lysyl hydroxylase                   | Collagen IV biosynthesis                               |
| PDD Interval | comp21518_c0_seq1  | comp117543_c0_seq1 | <i>Ttc39b</i>  | D7          | P           | Tetratricopeptide repeat protein 39B            | NA                                                     |
| PDD Interval | comp32386_c0_seq3  | comp78006_c0_seq1  | <i>Sca</i>     | D7          | P,Hr4       | Scabrous                                        | Neural patterning and interacts with the Notch pathway |
| PDD Interval | comp31831_c0_seq2  | comp9302_c0_seq1   | <i>Rngo</i>    | D7          | Hr1.3       | Rings lost                                      | Development                                            |
| Hormonal     | comp26537_c0_seq1  | comp33893_c0_seq1  | <i>to</i>      | D1          | Hr4         | Takeout                                         | Juvenile hormone binding protein                       |
| Hormonal     | comp30466_c0_seq1  | comp28293_c0_seq1  | <i>to</i>      | D1          | Hr1.3,Hr4   | Takeout                                         | Juvenile hormone binding protein                       |
| Hormonal     | comp30593_c0_seq1  | comp22834_c0_seq1  | <i>to</i>      | D1,D7       | Hr1.3       | Takeout                                         | Juvenile hormone binding protein                       |
| Hormonal     | comp33588_c0_seq1  | comp188240_c0_seq1 | <i>to</i>      | D7          | P,Hr4       | Takeout                                         | Juvenile hormone binding protein                       |
| Hormonal     | comp36183_c1_seq1  | comp26395_c0_seq1  | <i>ETHR</i>    | D7          | Hr1.3,Hr4   | ecdysis triggering hormone receptor             | Ecdysone binding                                       |

**Table S3.** Summary of GO term enrichment among significantly upregulated genes within each strain at each time point.

| E Strain                                    | Process                                      | p-value                                             | Function                                           | p-value        | Component | p-value |
|---------------------------------------------|----------------------------------------------|-----------------------------------------------------|----------------------------------------------------|----------------|-----------|---------|
| Photophase                                  | <b>0</b>                                     |                                                     | <b>1</b>                                           |                | <b>0</b>  |         |
|                                             |                                              |                                                     | <b>Hydrolase activity</b>                          | <b>0.00062</b> |           |         |
| Hour1                                       | <b>2</b>                                     |                                                     | <b>5</b>                                           |                | <b>0</b>  |         |
|                                             | light absorption                             | 0.000846                                            | cation: chloride symporter activity                | 0.0000954      |           |         |
|                                             | reactive nitrogen species metabolic process  | 0.000846                                            | anion transmembrane transporter activity           | 0.000215       |           |         |
|                                             |                                              |                                                     | inorganic anion transmembrane transporter activity | 0.000271       |           |         |
|                                             |                                              |                                                     | chloride transmembrane transporter activity        | 0.000965       |           |         |
|                                             |                                              | secondary active transmembrane transporter activity | 0.000983                                           |                |           |         |
| Hour4                                       | <b>5</b>                                     |                                                     | <b>0</b>                                           |                | <b>0</b>  |         |
|                                             | pigmentation                                 | 0.000538                                            |                                                    |                |           |         |
|                                             | developmental pigmentation                   | 0.000538                                            |                                                    |                |           |         |
|                                             | phenol-containing compound metabolic process | 0.000545                                            |                                                    |                |           |         |
|                                             | cuticle pigmentation                         | 0.000697                                            |                                                    |                |           |         |
| regulation of melanization defense response | 0.000903                                     |                                                     |                                                    |                |           |         |

| Z Strain                     | Process                                            | p-value  | Function                                       | p-value   | Component            | p-value  |
|------------------------------|----------------------------------------------------|----------|------------------------------------------------|-----------|----------------------|----------|
| Photophase                   | <b>6</b>                                           |          | <b>2</b>                                       |           | <b>0</b>             |          |
|                              | positive regulation of wound healing               | 0.000183 | catalytic activity                             | 0.000871  |                      |          |
|                              | cell projection assembly                           | 0.000298 | endopeptidase inhibitor activity               | 0.000883  |                      |          |
|                              | regulation of wound healing                        | 0.000319 |                                                |           |                      |          |
|                              | positive regulation of response to wounding        | 0.000515 |                                                |           |                      |          |
|                              | lamellipodium assembly                             | 0.00068  |                                                |           |                      |          |
| lamellipodium organization   | 0.00068                                            |          |                                                |           |                      |          |
| Hour1                        | <b>5</b>                                           |          | <b>3</b>                                       |           | <b>2</b>             |          |
|                              | nucleobase biosynthetic process                    | 0.000184 | structural constituent of chitin-based cuticle | 0.0000721 | extracellular matrix | 0.000253 |
|                              | DNA metabolic process                              | 0.000443 | structural constituent of cuticle              | 0.000124  | lipoamide complex    | 0.000559 |
|                              | de novo pyrimidine nucleobase biosynthetic process | 0.000671 | 2-methylpropanoyl transferring activity        | 0.000559  |                      |          |
|                              | pyrimidine nucleobase biosynthetic process         | 0.000671 |                                                |           |                      |          |
| nucleobase metabolic process | 0.000891                                           |          |                                                |           |                      |          |
| Hour4                        | <b>0</b>                                           |          | <b>1</b>                                       |           | <b>0</b>             |          |
|                              |                                                    |          | carboxylic ester hydrolase activity            | 0.000608  |                      |          |
